# Supplementary material for: Comparative Genome Analysis Reveals Cis-Regulatory Elements on Gene-Sized Chromosomes of Ciliated Protists
Source: Front Microbiol. 2022 Feb 21;13:775646. doi: 10.3389/fmicb.2022.775646 (PMC8899921; doi:10.3389/fmicb.2022.775646)
Supplement: Supplementary file 4 [file Table_1.XLSX]

## Sheet: Sheet1
Table S1. Data and picture sources, related to Figure 1.
Species	Data source	Picture source	Lisence	Photo Credit	Changes
Staphylococcus aureus	NCBI (GCF_000013425.1)	https://commons.wikimedia.org/wiki/File:Staphylococcus_aureus_01.jpg	Public domain	Janice Carr	Recolored
Escherichia coli	NCBI (GCF_000005845.2)	https://en.wikipedia.org/wiki/File:EscherichiaColi_NIAID.jpg	Public domain	Rocky Mountain Laboratories, NIAID, NIH	Recolored
Gloeobacter violaceus	NCBI (GCF_000011385.1)	https://en.wikipedia.org/wiki/Gloeobacter#/media/File:Gloeobacter.jpg	CC BY-SA 4.0	Burn12121212	Recolored
Saccharomyces cerevisiae	NCBI (GCF_000146045.2)	https://commons.wikimedia.org/wiki/File:S_cerevisiae_under_DIC_microscopy.jpg	Public domain	Masur	Recolored
Entamoeba histolytica	NCBI (GCA_015099795.1)	https://commons.wikimedia.org/wiki/File:Entamoeba_histolytica.jpg	CC BY-SA 3.0	Stefan Walkowski	Recolored
Stentor coeruleus	NCBI (GCA_001970955.1)	Laboratory of Protozoology, OUC	CC BY-SA 4.0	Laboratory of Protozoology, OUC	N/A
Euplotes octocarinatus	EOGD (http://ciliates.ihb.ac.cn/database/home/#eo)	Laboratory of Protozoology, OUC	CC BY-SA 4.0	Laboratory of Protozoology, OUC	N/A
Halteria grandinella	NCBI (GCA_006369765.1)	Laboratory of Protozoology, OUC	CC BY-SA 4.0	Laboratory of Protozoology, OUC	N/A
Stylonychia lemnae	NCBI (GCA_000751175.1)	Laboratory of Protozoology, OUC	CC BY-SA 4.0	Laboratory of Protozoology, OUC	N/A
Oxytricha trifallax	NCBI (GCA_000711775.1)	Laboratory of Protozoology, OUC	CC BY-SA 4.0	Laboratory of Protozoology, OUC	N/A
Pseudokeronopsis flava	The current work	The current work	CC BY-SA 4.0	The current work	N/A
Pseudokeronopsis carnea	The current work	The current work	CC BY-SA 4.0	The current work	N/A
Paramecium tetraurelia	NCBI (GCA_000165425.1)	Laboratory of Protozoology, OUC	CC BY-SA 4.0	Laboratory of Protozoology, OUC	N/A
Ichthyophthirius multifiliis	NCBI (GCA_000220395.1)	https://commons.wikimedia.org/wiki/File:Ichthyophthirius_multifiliis.jpg	CC BY 2.0	Andy Goodwin/USFWS	Recolored
Tetrahymena thermophila	NCBI (GCA_000189635.1)	Laboratory of Protozoology, OUC	CC BY-SA 4.0	Laboratory of Protozoology, OUC	N/A
Caenorhabditis elegans	NCBI (GCA_000002985.3)	https://commons.wikimedia.org/wiki/File:CelegansGoldsteinLabUNC.jpg	CC BY-SA 3.0	Bob Goldstein	Recolored
Arabidopsis thaliana	NCBI (GCA_000001735.2)	https://commons.wikimedia.org/wiki/File:Arabidopsis_thaliana.jpg	CC BY-SA 3.0	Roepers	Recolored
Drosophila melanogaster	NCBI (GCA_000001215.4)	https://commons.wikimedia.org/wiki/File:Drosophila_Female_ClipArt_-_MH.png	CC BY-SA 4.0	MA Hanson	Recolored
Danio rerio	NCBI (GCF_000002035.6)	https://commons.wikimedia.org/wiki/File:201108_zebrafish.png	CC BY-SA 4.0	DataBase Center for Life Science (DBCLS)	Not changed
